# Supplementary material for: Age-associated changes in human CD4+ T cells point to mitochondrial dysfunction consequent to impaired autophagy
Source: PubMed Central journal article supplement (PMC6874450; doi:10.18632/aging.102438), 2019-11-09
Supplement: aging-11-102438-s001.pdf [file aging-11-102438-s001.pdf]

## SUPPLEMENTARY TABLES

**Supplementary Table 1. Sample donors for four different iTRAQ-8plex experiments used to determine protein expression in CD4<sup>+</sup> T cells.**

| iTRAQ Subjects |          |     |          |     |          |     |          |     |
|----------------|----------|-----|----------|-----|----------|-----|----------|-----|
| iTRAQ          | iTRAQ 1  |     | iTRAQ 2  |     | iTRAQ 3  |     | iTRAQ 4  |     |
| Reagents       | Donor ID | Age | Donor ID | Age | Donor ID | Age | Donor ID | Age |
| 113            | ND70     | 30  | †ND73    | 21  | ND74     | 34  | *ND75    | 21  |
| 114            | †ND73    | 21  | ND74     | 34  | †ND73    | 21  | BL57     | 70  |
| 115            | BL36     | 74  | ND74     | 34  | ND72     | 34  | †ND73    | 21  |
| 116            | BL59     | 75  | BL46     | 74  | BL83     | 70  | ND74     | 34  |
| 117            | BL49     | 77  | BL23     | 73  | BL76     | 71  | BL31     | 71  |
| 118            | *BL43    | 74  | BL48     | 73  | BL56     | 72  | BL42     | 72  |
| 119            | BL46     | 76  | BL59     | 77  | BL67     | 73  | ND71     | 70  |
| 121            | BL54     | 82  | BL85     | 68  | BL74     | 83  | BL45     | 76  |

Donor ID letters indicate sample from either BLSA participant (BL) or normal donor (ND) followed by anonymized donor number.

CD4<sup>+</sup> T cell cytoplasmic extracts used in the analysis were from four young and 18 old male donors (\*two samples [BL43 and ND75] were not analyzed due to technical concerns).

†One common reference sample (ND73, yellow box) was used in all four different iTRAQ 8plex experiments to help in normalization among iTRAQ runs.

Some samples were used more than once as technical controls both within an iTRAQ 8plex experiment (as with sample ND74) and between iTRAQ 8plex experiment (as with samples BL59, BL46, and ND74).

Different ages with the same sample donor (BL59 and BL46) indicate blood collection from two different visits (technical control).

**Supplementary Table 2. Cellular origin of proteins with higher expression in CD4<sup>+</sup> T cells of older donors compared to younger donors as assessed by iTRAQ and mass spectrometry (LC-MS-MS).**

| <b>Oxidative phosphorylation proteins</b> | <b>Electron transport chain</b> |
|-------------------------------------------|---------------------------------|
| DHSA                                      | Complex 2                       |
| DHSB                                      | Complex 2                       |
| COX41                                     | Complex 4                       |
| CX7A2                                     | Complex 4                       |
| COX5A                                     | Complex 4                       |
| COX7B                                     | Complex 4                       |
| COX7C                                     | Complex 4                       |
| COX2                                      | Complex 4                       |
| NDUA4                                     | Complex 4                       |
| ATPA                                      | Complex 5                       |
| ATPB                                      | Complex 5                       |
| ATP6                                      | Complex 5                       |
| ATP5H                                     | Complex 5                       |
| ATP5J                                     | Complex 5                       |
| ATPO                                      | Complex 5                       |
| ATPD                                      | Complex 5                       |

  

| <b>Membrane proteins</b> | <b>Subcellular location</b>                       |
|--------------------------|---------------------------------------------------|
| GPDM                     | mitochondrial                                     |
| NB5R3                    | cytoplasmic, mitochondrial and other membranes    |
| MPCP                     | mitochondrial                                     |
| CYB5B                    | mitochondrial                                     |
| BCL2                     | mitochondrial, nuclear, endoplasmic reticulum     |
| STML2                    | mitochondrial                                     |
| ADT1                     | mitochondrial inner membrane, multipass membranes |

  

| <b>Non-Mitochondrial proteins</b> | <b>Subcellular location</b>               |
|-----------------------------------|-------------------------------------------|
| HNRPL                             | nuclear                                   |
| SUN2                              | nucleus inner membrane, endosome membrane |
| LMNB1                             | nuclear                                   |
| PGRC2                             | membrane binding protein                  |
| ITAM                              | membrane                                  |
| DPM1                              | membrane                                  |

**Supplementary Table 3. Sample donors for performing microarray gene-expression analysis using RNA isolated from CD4<sup>+</sup> T cells obtained from 33 donors (24 men and 9 women of which 8 were young [25–38 years old] and 25 old [70–82 years old]).**

| Microarray Subjects |     |     |     |                  |
|---------------------|-----|-----|-----|------------------|
| Donor ID            | Age | Sex | Y/O |                  |
| ND29                | 25  | M   | Y   | 8 Young<br>5M/3F |
| ND703               | 26  | F   | Y   |                  |
| ND60A               | 29  | F   | Y   |                  |
| BL10                | 30  | M   | Y   |                  |
| ND340               | 30  | M   | Y   |                  |
| ND691               | 32  | M   | Y   |                  |
| ND554               | 33  | M   | Y   |                  |
| BL71                | 38  | F   | Y   |                  |
| BL47                | 70  | F   | O   | 25 Old<br>19M/6F |
| BL17                | 70  | M   | O   |                  |
| BL48                | 70  | M   | O   |                  |
| BL57                | 70  | M   | O   |                  |
| BL83                | 70  | M   | O   |                  |
| ND31                | 71  | F   | O   |                  |
| BL23                | 71  | M   | O   |                  |
| BL31                | 71  | M   | O   |                  |
| BL43                | 71  | M   | O   |                  |
| BL22                | 72  | M   | O   |                  |
| BL42                | 72  | M   | O   |                  |
| BL56                | 72  | M   | O   |                  |
| BL50                | 73  | F   | O   |                  |
| BL7                 | 73  | M   | O   |                  |
| BL26                | 73  | M   | O   |                  |
| BL36                | 74  | M   | O   |                  |
| BL46                | 74  | M   | O   |                  |
| BL13                | 75  | F   | O   |                  |
| BL9                 | 75  | M   | O   |                  |
| BL63                | 75  | M   | O   |                  |
| BL39                | 79  | M   | O   |                  |
| BL40                | 80  | F   | O   |                  |
| BL2                 | 81  | F   | O   |                  |
| BL54                | 82  | M   | O   |                  |
| BL82                | 82  | M   | O   |                  |

Donor ID letters indicate sample from either BLSA participant (BL) or normal donor (ND) followed by anonymized donor number. 8 Young (5M/3F), 25 Old (19M/6F).

**Supplementary Table 4A. Sample donors for OROBOROS mitochondrial respiration analysis using CD4<sup>+</sup> T cells obtained from 14 men (22–93 y/o; 7 young, 7 old).**

| OROBOROS Subjects |     |     |     |          |
|-------------------|-----|-----|-----|----------|
| Donor ID          | Age | Sex | Y/O |          |
| TP22              | 22  | M   | Y   | 7 Young  |
| TP23              | 22  | M   | Y   | All M    |
| TP21              | 23  | M   | Y   | 22 to 35 |
| TP26              | 28  | M   | Y   |          |
| TP25              | 30  | M   | Y   |          |
| TP20              | 34  | M   | Y   |          |
| TP24              | 35  | M   | Y   |          |
| BL96              | 80  | M   | O   | 7 Old    |
| BL97              | 80  | M   | O   | All M    |
| BL92              | 82  | M   | O   | 80 to 93 |
| BL91              | 84  | M   | O   |          |
| BL93              | 85  | M   | O   |          |
| BL95              | 85  | M   | O   |          |
| BL94              | 93  | M   | O   |          |

**Supplementary Table 4B. Percentage of Naïve (N) and Memory [Central Memory (CM) and Effector Memory (EM)] CD4<sup>+</sup> cells.**

| Donor ID | Y/O | % of Naïve | % of Memory |
|----------|-----|------------|-------------|
| TP22     | Y   | 45         | 36          |
| TP23     | Y   | 47         | 33          |
| TP21     | Y   | 64         | 21          |
| TP26     | Y   | 59         | 24          |
| TP25     | Y   | 52         | 31          |
| TP20     | Y   | 38         | 37          |
| TP24     | Y   | 47         | 37          |
| BL96     | O   | 18         | 59*         |
| BL97     | O   | 55         | 26          |
| BL92     | O   | 26         | 48          |
| BL91     | O   | 40         | 38          |
| BL93     | O   | 53         | 27          |
| BL95     | O   | 48         | 29          |
| BL94     | O   | 38         | 41          |

\*outlier.

Donor ID letters indicate sample from either BLSA participant (BL) or Tissue Procurement donor (TP) followed by anonymized donor number. Male (M), Female (F), Young (Y), Old (O).

**Supplementary Table 5. Sample donors for analysis of CD4<sup>+</sup> naïve cells and CD4<sup>+</sup> memory cells from younger and older volunteers by transmission electron microscopy (TEM) looking at mitochondrial numbers, mitochondrial areas, and also autophagosomes, autolysosomes, and autophagic vacuoles.**

| <b>TEM Subjects</b> |            |            |            |                     |
|---------------------|------------|------------|------------|---------------------|
| <b>Donor ID</b>     | <b>Age</b> | <b>Sex</b> | <b>Y/O</b> | <b>Naïve/Memory</b> |
| ND83                | 22         | F          | Y          | Naïve and Memory    |
| ND84                | 26         | F          | Y          | Naïve and Memory    |
| ND82                | 27         | M          | Y          | Naïve and Memory    |
| ND78                | 31         | M          | Y          | Naïve and Memory    |
| ND79                | 34         | F          | Y          | Naïve and Memory    |
| ND76                | 70         | M          | O          | Naïve and Memory    |
| ND77                | 72         | M          | O          | Naïve and Memory    |
| BL98                | 76         | M          | O          | Naïve and Memory    |
| BL99                | 80         | M          | O          | Naïve and Memory    |

5 Young (23 to 34): 5 Young Naïve and 5 Young Memory

5 Old (70 to 80): 5 Old Naïve and 5 Old Memory

Donor ID letters indicate sample from either BLSA participant (BL) or normal donor (ND) followed by anonymized donor number.

Male (M), Female (F), Young (Y), Old (O).

**Supplementary Table 6. Sample donors for mitophagy detection analysis using CD4<sup>+</sup> T cells obtained from 24 men and women (23–90 y/o; 12 young, 12 old).**

| <b>Donor ID</b> | <b>Age</b> | <b>Sex</b> | <b>Y/O</b> |
|-----------------|------------|------------|------------|
| TP32            | 23         | M          | Y          |
| TP34            | 23         | M          | Y          |
| TP35            | 26         | F          | Y          |
| TP28            | 28         | F          | Y          |
| TP27            | 29         | F          | Y          |
| BL108           | 31         | F          | Y          |
| BL104           | 31         | M          | Y          |
| TP31            | 32         | M          | Y          |
| TP33            | 32         | M          | Y          |
| TP30            | 34         | F          | Y          |
| TP29            | 35         | M          | Y          |
| BL110           | 38         | F          | Y          |
| BL112           | 75         | F          | O          |
| BL102           | 76         | M          | O          |
| BL109           | 76         | F          | O          |
| BL106           | 77         | M          | O          |
| BL111           | 79         | F          | O          |
| BL101           | 79         | M          | O          |
| BL103           | 81         | M          | O          |
| BL113           | 81         | F          | O          |
| BL114           | 82         | F          | O          |
| BL105           | 83         | M          | O          |
| BL100           | 88         | M          | O          |
| BL107           | 90         | F          | O          |

Donor ID letters indicate sample from either BLSA participant (BL) or Tissue Procurement donor (TP) followed by anonymized donor number.

Male (M), Female (F), Young (Y), Old (O).
